# Supplementary material for: WSSV exploits AMPK to activate mTORC2 signaling for proliferation by enhancing aerobic glycolysis
Source: PubMed Central journal article supplement (PMC10070494; doi:10.1038/s42003-023-04735-z), 2023-04-03
Supplement: 42003_2023_4735_MOESM1_ESM.pdf [file 42003_2023_4735_MOESM1_ESM.pdf]

**Supplementary Materials**

**WSSV exploits AMPK to activate mTORC2 signaling for viral proliferation by enhancing aerobic glycolysis**

Peng Zhang<sup>1#</sup>, Hai-Jing Fu<sup>1#</sup>, Li-Xia Lv<sup>1</sup>, Chen-Fei Liu<sup>1</sup>, Chang Han<sup>1</sup>, Xiao-Fan Zhao<sup>1</sup>, Jin-Xing Wang<sup>1,2,\*</sup>

**The PDF contains:**

Supplementary Figure 1-9

Supplementary Table 1

Uncropped and unedited blot images: Supplementary Figure 10-33

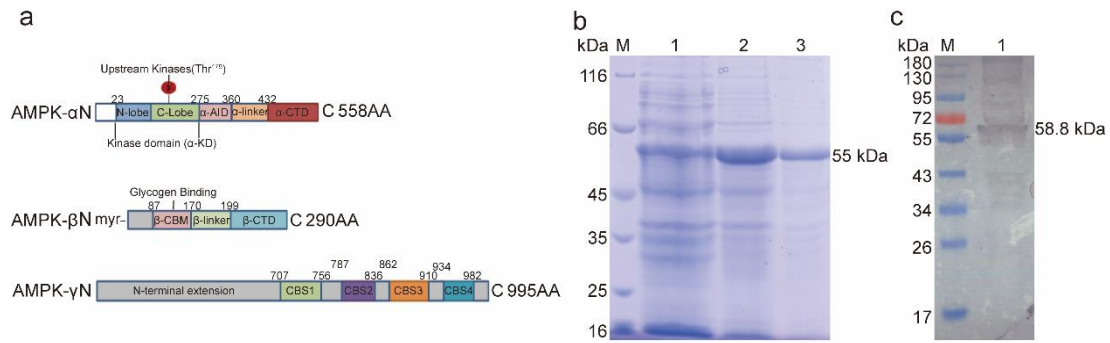

**Supplementary Figure 1 Domain architectures of the AMPK complex and antibody preparation of AMPK $\alpha$ .** **a** The domain architectures of three AMPK subunits from *M. japonicus*. **b** Recombinant expression in *E. coli* and purification of AMPK $\alpha$ . Lane 1, total proteins of *E. coli* with AMPK $\alpha$ -pGEX4T-2 without IPTG induction; Lane 2, Total proteins of the *E. coli* with IPTG induction; Lane 3, Purified recombinant AMPK $\alpha$ ; lane M, protein molecular mass markers. **c** Western blotting using AMPK $\alpha$  polyclonal antibodies to detect AMPK $\alpha$  in normal hemocytes of shrimp. Lane M, protein molecular mass markers; Lane 1, the native AMPK $\alpha$  in hemocytes detected using AMPK $\alpha$  polyclonal antibodies.



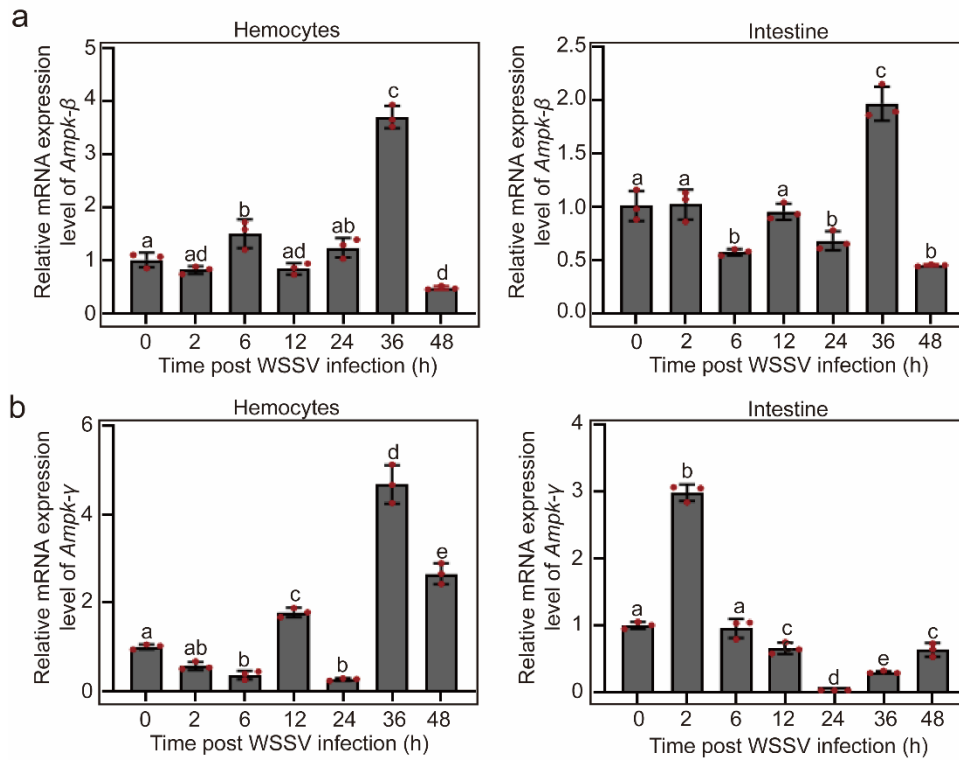

**Supplementary Figure 3 Expression profiles of AMPKs in shrimp challenged by WSSV. a** The expression patterns of *Ampkβ* in hemocytes and intestine of the shrimp analyzed using qPCR. **b** The expression patterns of *Ampkγ* in hemocytes and intestine of the shrimp. All results shown are means ± SD for experiments performed at least three times. Multiple different comparisons were analyzed with log-rank test using the GraphPad Prism 8.0 software and a significant difference was accepted at  $P < 0.05$ .

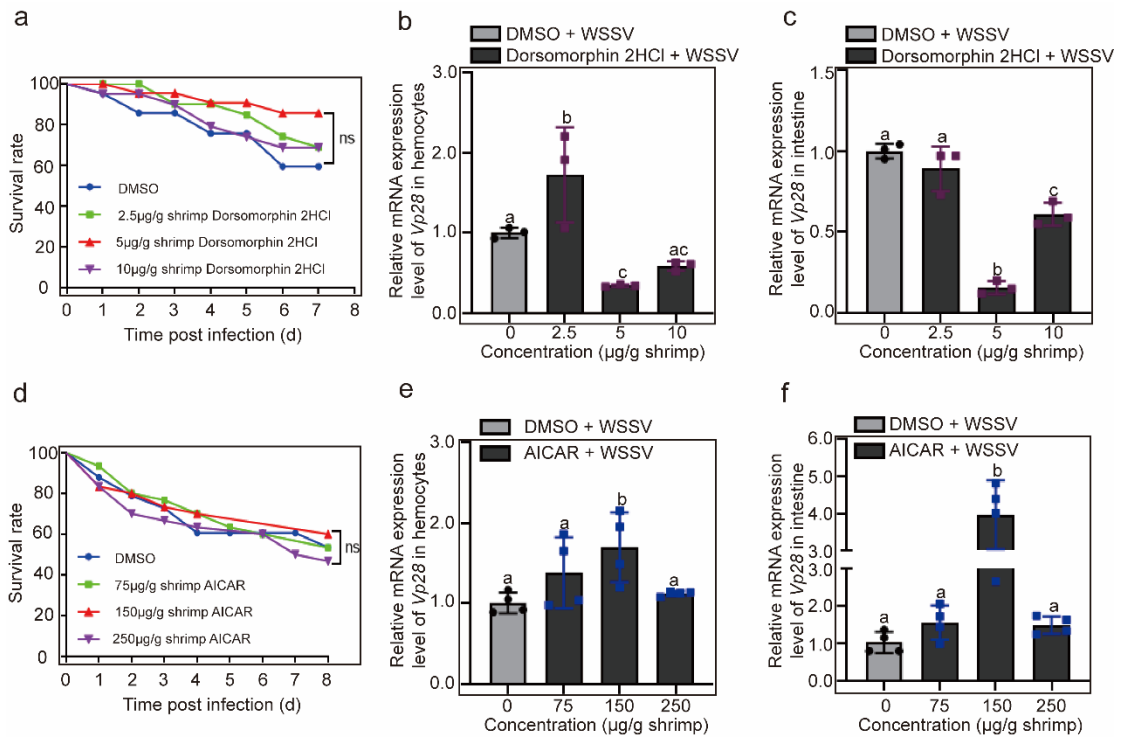

**Supplementary Figure 4 Survival analysis of shrimp injected with different concentrations of Dorsomorphin 2HCL and AICAR, and WSSV replication analysis in the shrimp following WSSV infection. a** Survival rate of shrimp injected with different concentrations of Dorsomorphin 2HCL. **b, c** *Vp28* expression in hemocytes (**b**) and intestine (**c**) of shrimp injected with different concentrations of Dorsomorphin 2HCL following WSSV infection. Shrimp injected with the same amount of DMSO were used as controls. **d** Survival rate of shrimp injected with different concentrations of AICAR. **e, f** *Vp28* expression in hemocytes (**e**) and intestine (**f**) of shrimp injected with different concentrations of AICAR following WSSV infection. Shrimp injected with the same amount of DMSO in each group were used as controls. All results shown are means  $\pm$  SD for experiments performed at least three times. Multiple different comparisons were analyzed with log-rank test using the GraphPad Prism 8.0 software and a significant difference was accepted at  $P < 0.05$ .

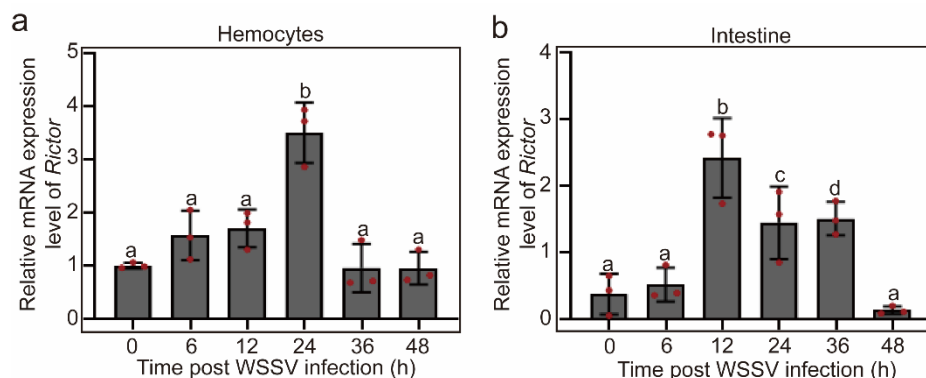

**Supplementary Figure 5 Expression profiles of Rictor in hemocytes (a) and intestines (b) of shrimp challenged by WSSV analyzed using qPCR.** All results shown are means  $\pm$  SD for experiments performed at least three times. Multiple different comparisons were analyzed with log-rank test using the GraphPad Prism 8.0 software and a significant difference was accepted at  $P < 0.05$ .

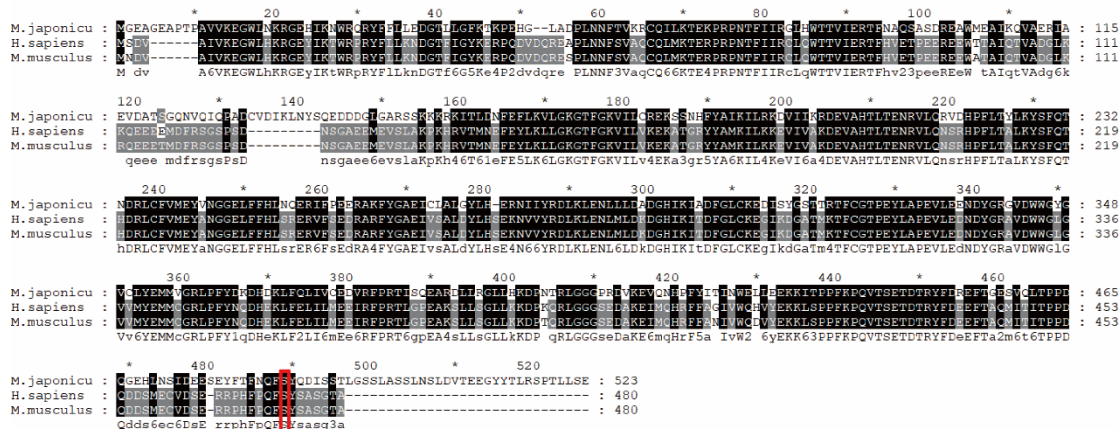

**Supplementary Figure 6 Alignment of shrimp AKT amino acid sequence with AKTs of other species.** The conserved phosphorylation sites were boxed in red.

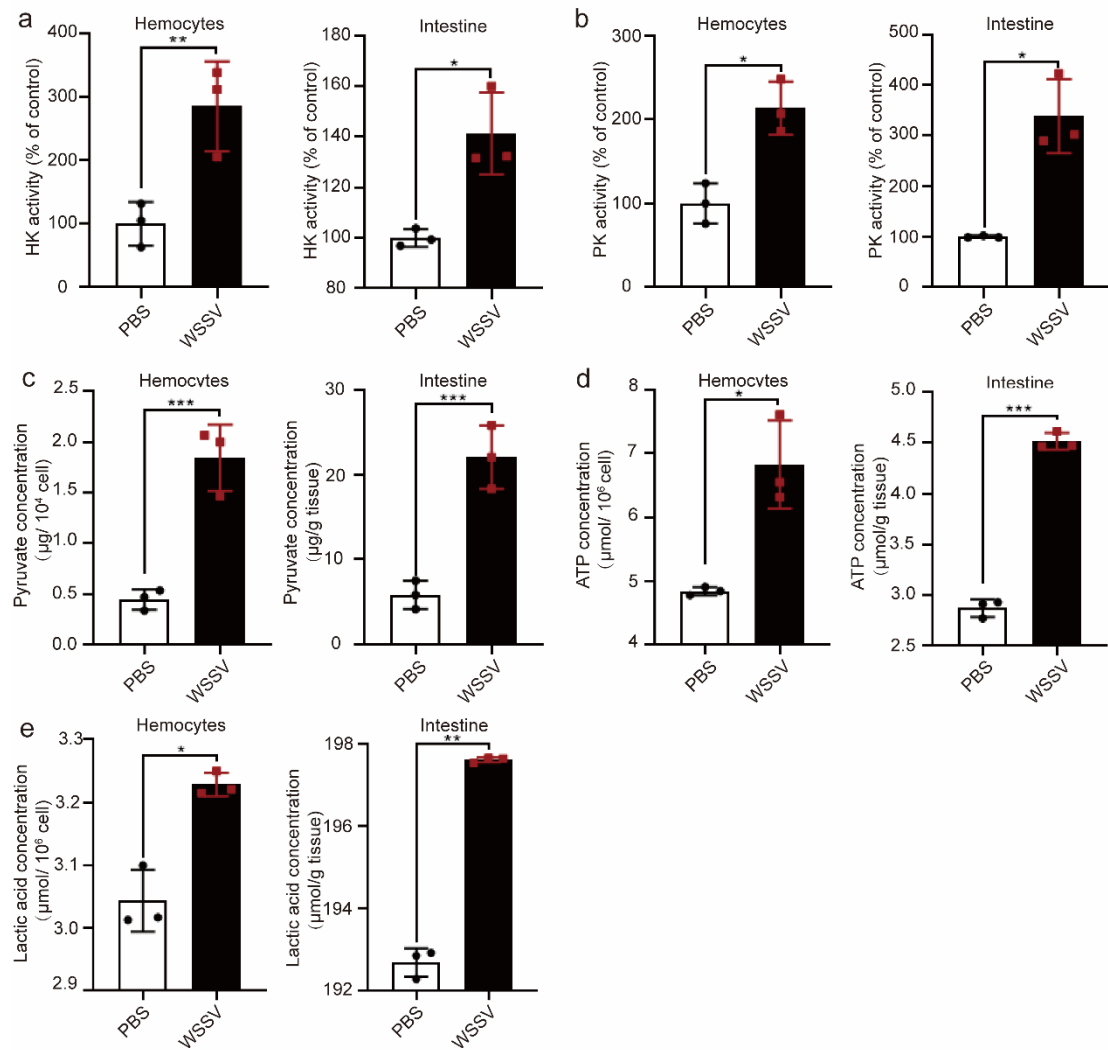

**Supplementary Figure 7** Changes in the enzyme activities and glycolytic metabolites during WSSV infection in shrimp. **a** HK activity analysis in hemocytes and intestine of shrimp challenged by WSSV, PBS injection was used as a control. **b** PK activity analysis in hemocytes and intestine of shrimp challenged by WSSV, PBS injection was used as a control. **c** Pyruvate level analysis in hemocytes and intestine of shrimp challenged by WSSV, PBS injection was used as a control. **d** ATP level analysis in hemocytes and intestine of shrimp challenged by WSSV, PBS injection was used as a control. **e** LA level analysis in hemocytes and intestine of shrimp challenged by WSSV, PBS injection was used as a control. All results are shown by means  $\pm$  SD for experiments were performed at least three times; the data were analyzed statistically using Student's t test. \*,  $P < 0.05$ ; \*\*,  $P < 0.01$ ; \*\*\*,  $P < 0.001$ .

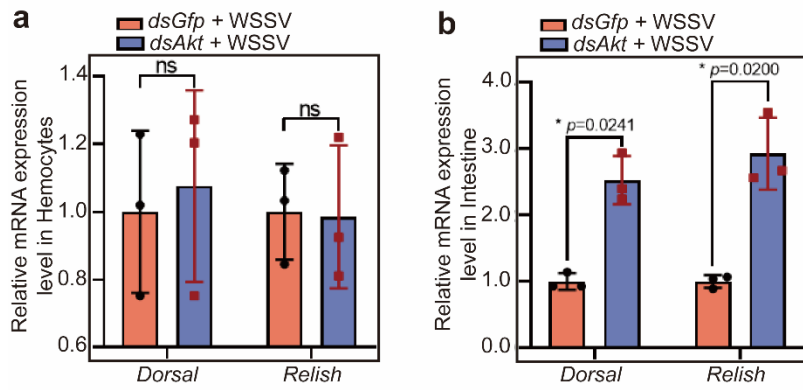

**Supplementary Figure 8 The expression of *Dorsal* and *Relish* in *Akt*-knockdown shrimp challenged by WSSV analyzed by qPCR.** a. Hemocytes, b. Intestine. All results are shown by means  $\pm$  SD for experiments were performed at least three times; the data were analyzed statistically using Student's t test. \*,  $P < 0.05$ ; \*\*,  $P < 0.01$ ; \*\*\*,  $P < 0.001$ .



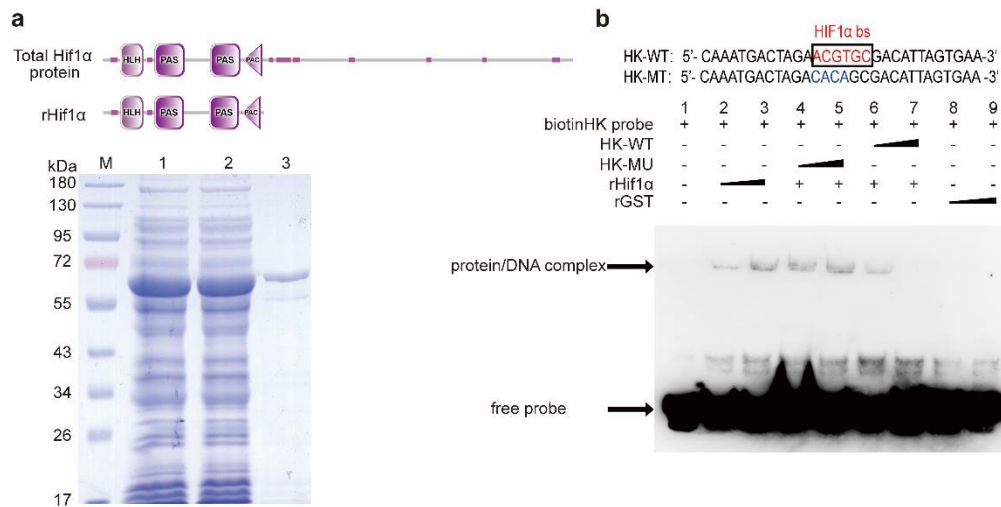

**Supplementary Figure 9 The binding activity of rHIF1 $\alpha$  to binding site in HK promoter region was detected by EMSA *in vitro*.** **a** Domain architectures of HIF1 $\alpha$  and recombinant expression in *E. coli* and purification of HIF1 $\alpha$ . Lane 1, total proteins of *E. coli* with pGEX4T-2/HIF1 $\alpha$  with 0.1 mM IPTG induction; Lane 2, Total proteins of the *E. coli* with 0.5 mM IPTG induction; Lane 3, Purified recombinant HIF1 $\alpha$ ; lane M, protein molecular mass markers. **b** Upper panel: synthesized probe sequences containing binding site from promoter sequence of HK. Lower panel: EMSA was performed to validate the interaction of rHIF1 $\alpha$  with its binding site in HK promoter. Lane 1: negative group (without rHIF1 $\alpha$ ); Lane 2-3: positive groups (1, 3  $\mu$ g rHIF1 $\alpha$ ); Lane 4-5: mutant HK group (3  $\mu$ g rHIF1 $\alpha$  incubated with two different concentrations of mutant HK probes; HK-MU, mutant HK probes without biotin); Lane 6-7: wild HK group (3  $\mu$ g rHIF1 $\alpha$  incubated with two different concentrations of wild HK probes; HK-WT, wild HK probes without biotin); Lane 8-9: GST control protein (1, 3  $\mu$ g rGST).

**Supplementary Table 1. Sequences of primers used in the present study**

| Primers                              | Sequence (5'-3')                                 | Gene target and GenBank number | T <sub>m</sub> <sup>1</sup> (°C) | A <sup>2</sup> (bp) | Efficiency <sup>3</sup> (%) |
|--------------------------------------|--------------------------------------------------|--------------------------------|----------------------------------|---------------------|-----------------------------|
| <b>RT-PCR and qPCR</b>               |                                                  |                                |                                  |                     |                             |
| IE1-RT-F                             | GACTCTACAAATCTCTTTGCCA                           | <i>Ie1</i> ,                   | 51.9                             |                     |                             |
| IE1-RT-R                             | CTACCTTTGCACCAATTGCTAG                           | AF332093                       | 50.8                             | 502                 | 123.57                      |
| VP28-RT-F                            | AGCTCCAACACCTCCTCCTTCA                           | <i>Vp28</i> ,                  | 60.6                             |                     |                             |
| VP28-RT-F                            | TTACTCGGTCTCAGTGCCAGA                            | AY422228                       | 57.8                             | 162                 | 101.20                      |
| $\beta$ -actin-RT-F                  | AGTAGCCGCCCTGGTTGTAGAC                           | <i>Actb</i> ,                  | 55.3                             |                     |                             |
| $\beta$ -actin-RT-R                  | TTCTCCATGTCGTCCAGT                               | GU645235                       | 54.6                             | 240                 | 107.78                      |
| <i>Ef-1<math>\alpha</math></i> -RT-F | GGATTGCCACACCGCTCACA                             | <i>Ef1a</i> ,                  | 61.4                             |                     |                             |
| <i>Ef-1<math>\alpha</math></i> -RT-R | CACAGCCACCGTTTGCTTCAT                            | AB458256                       | 58.9                             | 223                 | 98.83                       |
| AMPK $\alpha$ -RT-F                  | ACAAGCGTTTTGCTGATGC                              | <i>Ampka</i> ,                 | 57.0                             |                     |                             |
| AMPK $\alpha$ -RT-R                  | CTCGCAAAGGTGCTATTCTC                             | OL364937                       | 55.3                             | 156                 | 101.56                      |
| AMPK $\beta$ -RT-F                   | GATGGCAAAGATAGTGAAGAGC                           | <i>Ampkb</i> ,                 | 56.2                             |                     |                             |
| AMPK $\beta$ -RT-R                   | GTAGGTCCACAATGGCAACA                             | OL364938                       | 56.3                             | 196                 | 116.83                      |
| AMPK $\gamma$ -RT-F                  | TCAAACGCCTCACGGAAAC                              | <i>Ampkr</i>                   | 59.1                             |                     |                             |
| AMPK $\gamma$ -RT-R                  | CGATGTAGCGGCAAGAATGT                             | XP042865                       | 58.7                             | 284                 | 126.91                      |
|                                      |                                                  | 543                            |                                  |                     |                             |
| CAMKK-RT-F                           | TGATGGGGACGTGGAAGAA                              | <i>Camkk</i>                   | 58.9                             |                     |                             |
| CAMKK-RT-R                           | CGACACCGGATACTTCAGGA                             | XP042859                       | 58.1                             | 216                 | 108.27                      |
|                                      |                                                  | 770                            |                                  |                     |                             |
| HK-RT-F                              | GCTTAGATTTTCATCCGCACAG                           | <i>Hk</i> ,                    | 57.8                             |                     |                             |
| HK-RT-R                              | CAGTCAGCGTCAGTAGCATTG                            | OL364939                       | 56.8                             | 283                 | 89.40                       |
| PFK-RT-F                             | GGAGAAGTTGCCGTATTTGA                             | <i>Pfk</i> ,                   | 55.4                             |                     |                             |
| PFK-RT-R                             | CACGATAGTCTGGGCTGTTT                             | OL364940                       | 55.1                             | 178                 | 83.73                       |
| PK-RT-F                              | CTCGTGGTGATTTGGGAATT                             | <i>Pk</i> ,                    | 56.3                             |                     |                             |
| PK-RT-R                              | TGAGTCAGTGGGCAGATGGA                             | OL364941                       | 56.9                             | 255                 | 92.88                       |
| Glut1-RT-F                           | AACTGCGGACTGAACACCTC                             | <i>Glut1</i> ,                 | 54.7                             |                     |                             |
| Glut1-RT-R                           | TCTTCGTAGGGCTCTTCGTG                             | OL364942                       | 56.9                             | 162                 | 93.60                       |
| HIF1 $\alpha$ -RT-F                  | CCCAGAAGAACAGCGAGAA                              | <i>Hif1a</i>                   | 54.7                             |                     |                             |
| HIF1 $\alpha$ -RT-R                  | TCAGGTAGGCAATGGTAAGC                             | XP042868                       | 54.5                             | 171                 | 102.30                      |
|                                      |                                                  | 035                            |                                  |                     |                             |
| Rictor-RT-F                          | TCAGGGCAGTGTTATGTTGG                             | <i>Rictor</i> ,                | 55                               |                     |                             |
| Rictor-RT-R                          | AAGGCGAGGTTAAGGAAAAG                             | OK143319                       | 52.2                             | 162                 | 81.72                       |
| AKT-RT-F                             | GTTGACTGGTGGGGTTATGGA                            | <i>Akt</i> ,                   | 57.1                             |                     |                             |
| AKT-RT-R                             | GGTGTAGTAGAAGGGGTGATT                            | KP419299                       | 54.0                             | 243                 | 106.06                      |
| <b>Recombinant expression</b>        |                                                  |                                |                                  |                     |                             |
| AMPK $\alpha$ -EX-F                  | TACTCAGTCGACATGGAGGTCGGCCAGGGA                   |                                |                                  |                     |                             |
| AMPK $\alpha$ -EX-R                  | TACTCAGCGGCCGCTTAACGAGCTAGTTCTGT                 |                                |                                  |                     |                             |
| AMPK $\alpha$ -EX-F2                 | TACTCAGTCGACGGTCATTACCAGATCGGA                   |                                |                                  |                     |                             |
| AMPK $\alpha$ -EX-R2                 | TACTCAGCGGCCGCTTCTGGAACCATTCATG                  |                                |                                  |                     |                             |
| <b>SiRNA</b>                         |                                                  |                                |                                  |                     |                             |
| Primers                              | Sequence (5'-3')                                 |                                |                                  |                     |                             |
| GFP- Oligo1                          | GATCACTAATACGACTCACTATAGGGGGAGTTGTCCCAATTCTTGTT  |                                |                                  |                     |                             |
| GFP- Oligo2                          | AACAAGAATTGGGACAACCTCCCCCTATAGTGAGTCGTATTAGTGATC |                                |                                  |                     |                             |
| GFP- Oligo3                          | AAGGAGTTGTCCCAATCTTGCCCTATAGTGAGTCGTATTAGTGATC   |                                |                                  |                     |                             |
| GFP- Oligo4                          | GATCACTAATACGACTCACTATAGGGCAAGAATTGGGACAACCTCCTT |                                |                                  |                     |                             |
| AMPK $\alpha$ -Oligo1                | GATCACTAATACGACTCACTATAGGGGGCTGCACCAGAAGTTATATTT |                                |                                  |                     |                             |
| AMPK $\alpha$ -Oligo2                | AAATATAACTTCTGGTGCAGCCCCTATAGTGAGTCGTATTAGTGATC  |                                |                                  |                     |                             |
| AMPK $\alpha$ -Oligo3                | AAGCTGCACCAGAAGTTATATCCCTATAGTGAGTCGTATTAGTGATC  |                                |                                  |                     |                             |
| AMPK $\alpha$ -Oligo4                | GATCACTAATACGACTCACTATAGGGATGGCCGTCTGGTTCTTGCTT  |                                |                                  |                     |                             |
| AMPK $\beta$ -Oligo1                 | GATCACTAATACGACTCACTATAGGGCCTACTCTCCAGGAGAATTT   |                                |                                  |                     |                             |
| AMPK $\beta$ -Oligo2                 | AAATTCTCCCTGGAGAGTAGGCCCTATAGTGAGTCGTATTAGTGATC  |                                |                                  |                     |                             |
| AMPK $\beta$ -Oligo3                 | AACCTACTCTCCAGGGAGAATCCCTATAGTGAGTCGTATTAGTGATC  |                                |                                  |                     |                             |
| AMPK $\beta$ -Oligo4                 | GATCACTAATACGACTCACTATAGGGATTCTCCCTGGAGAGTAGGTT  |                                |                                  |                     |                             |
| <b>RNAi</b>                          |                                                  |                                |                                  |                     |                             |

|             |                                            |
|-------------|--------------------------------------------|
| GFP-Ri-F    | TAATACGACTCACTATAGGGGGGTGTACAGCTCGTCCATGC  |
| GFP-Ri-R    | TAATACGACTCACTATAGGGCTTGTACAGCTCGTCCATGC   |
| CAMKK-Ri-F  | GCGTAATACGACTCACTATAGGGCAATGGGCGTGACCTTAT  |
| CAMKK-Ri-R  | GCGTAATACGACTCACTATAGGTCAAGCGACCTCTTCCTGT  |
| Rictor-Ri-F | GCGTAATACGACTCACTATAGGGAAGCAGATGGGAAAAATA  |
| Rictor-Ri-R | GCGTAATACGACTCACTATAGGCAAGCGGAATGAATAGGAA  |
| Raptor-Ri-F | GCGTAATACGACTCACTATAGGGAGACATAATGGAACAGAAG |
| Raptor-Ri-R | GCGTAATACGACTCACTATAGGTTGGATGAAAGAGTAACACA |
| AKT-Ri-F    | GCGTAATACGACTCACTATAGGGGGCGAGAAGCTCAAAGAA  |
| AKT-Ri-R    | GCGTAATACGACTCACTATAGGAACCCACCAGTCAACACCT  |

---

1. Annealing temperature (°C)
2. Amplicon size (bp)
3. qPCR assay efficiencies of related genes (%)

:  
**Uncropped and unedited blot/gel images**

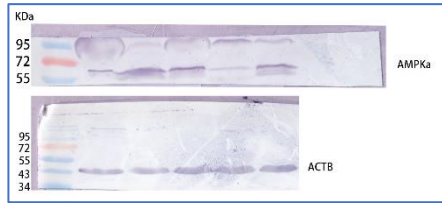

**Supplementary Figure 10. Western blots of Figure 1b. The blot image is from two blot membranes.**

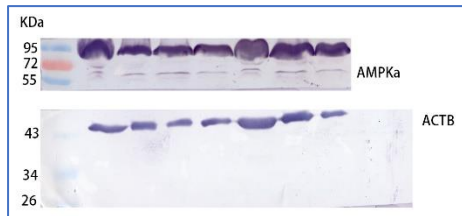

**Supplementary Figure 11. Western blots of Figure 1e. The blot image is from two blot membranes.**

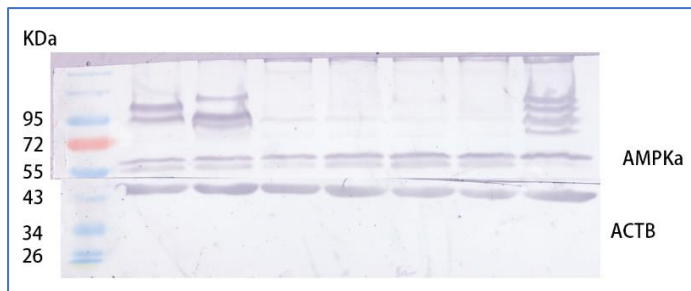

**Supplementary Figure 12. Western blots of Figure 1f. The blot image is from the same blot membrane.**

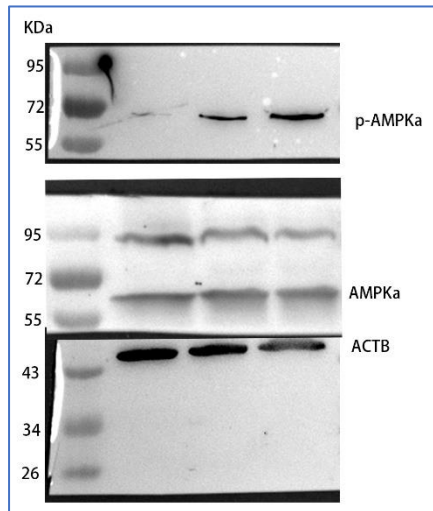

**Supplementary Figure 13. Western blots of Figure 1g. The blot image is from three blot membranes.**

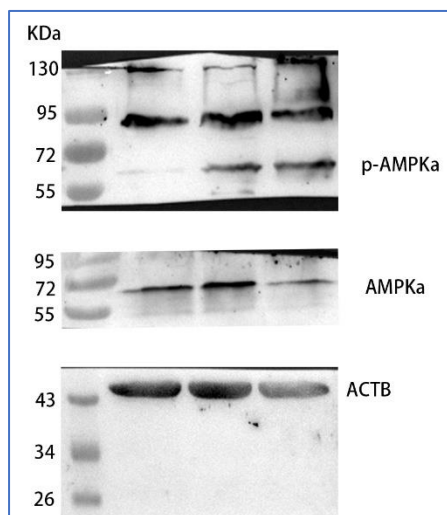

**Supplementary Figure 14. Western blots of Figure 1h. The blot image is from three blot membranes.**

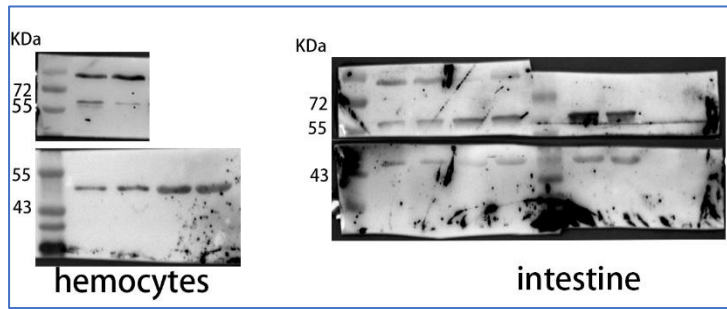

**Supplementary Figure 15. Western blots of Figure 2b. The blot image is from three blot membranes.**

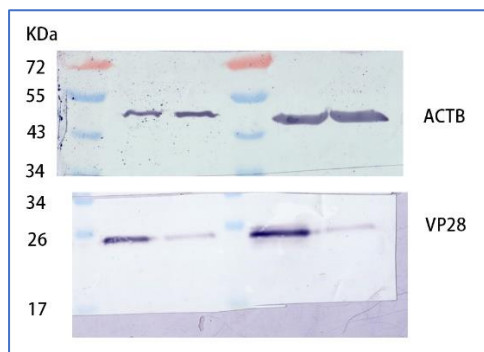

**Supplementary Figure 16. Western blots of Figure 2d. The blot image is from two blot membranes.**

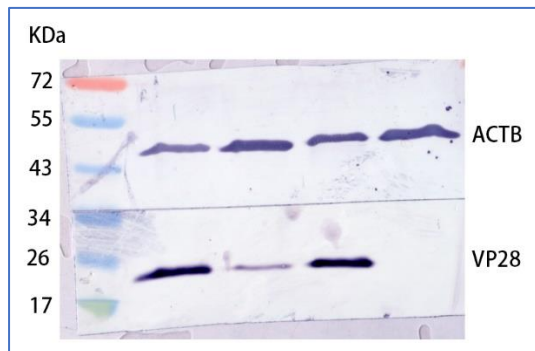

**Supplementary Figure 17. Western blots of Figure 2i. The blot image is from the same blot membrane.**

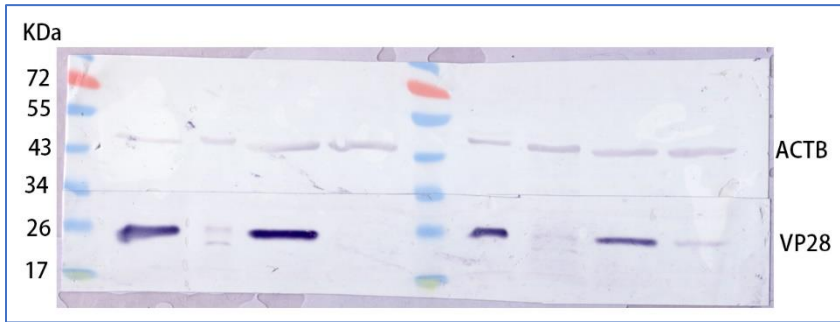

**Supplementary Figure 18. Western blots of Figure 3b. The blot image is from the same blot membrane.**

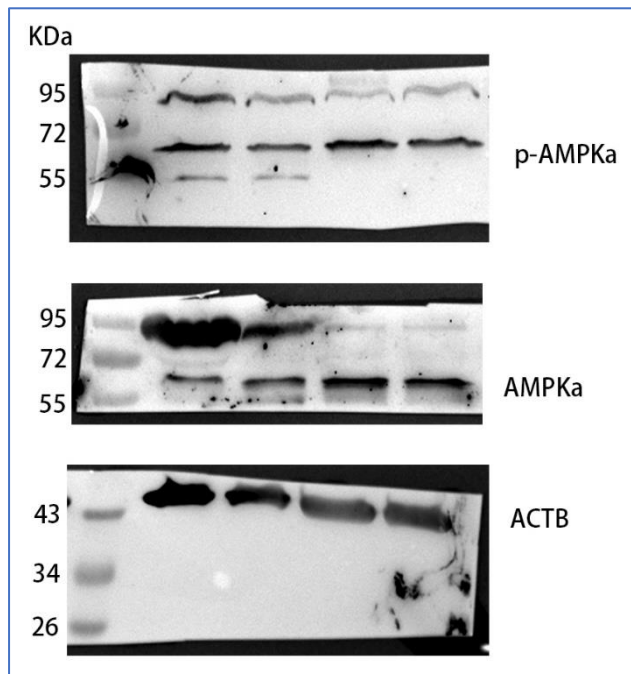

**Supplementary Figure 19. Western blots of Figure 3c. The blot image is from three blot membranes.**

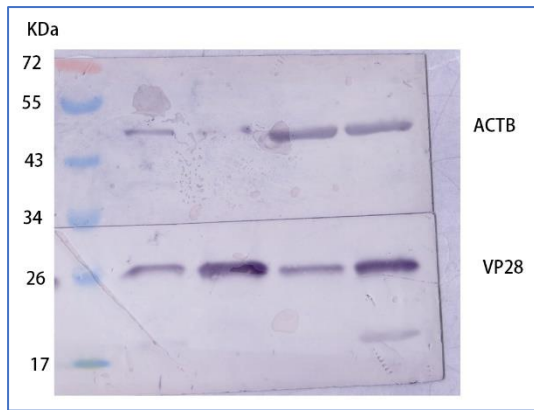

**Supplementary Figure 20.** Western blots of Figure 3f. The blot image is from the same blot membrane.

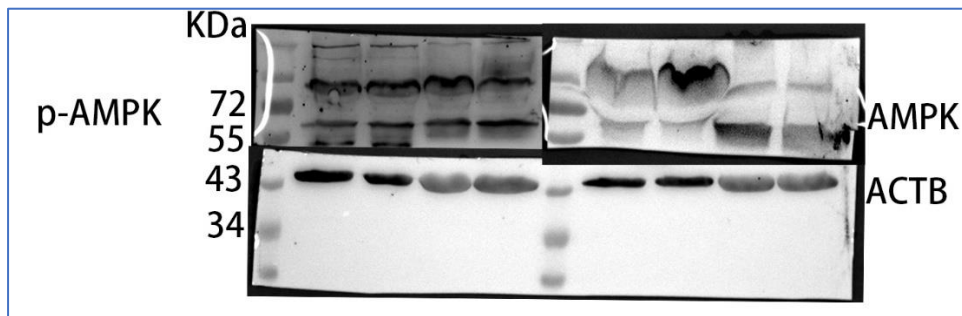

**Supplementary Figure 21.** Western blots of Figure 3g. The blot image is from the same blot membrane.



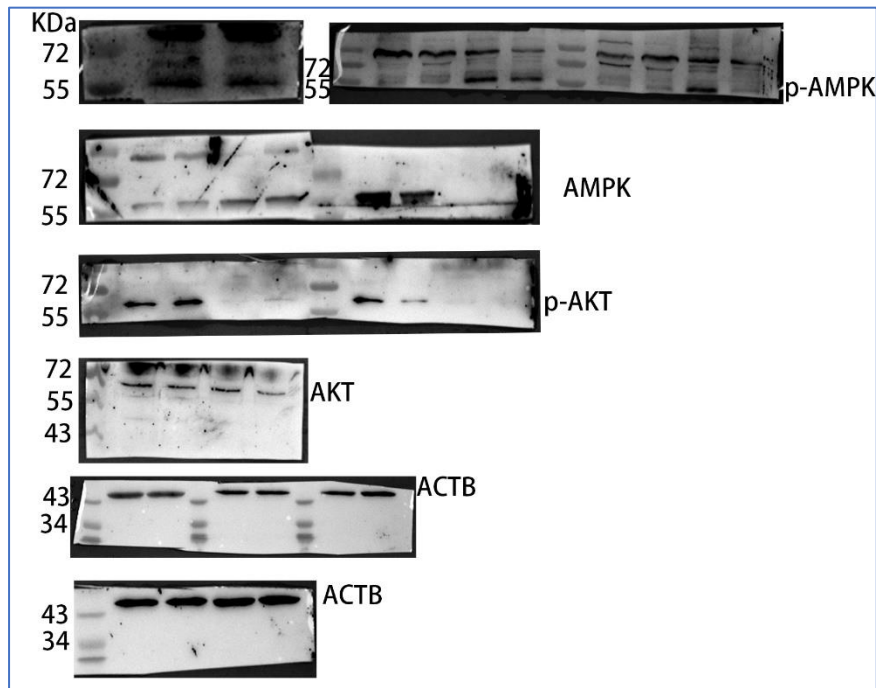

**Supplementary Figure 22. Western blots of Figure 4c. The blot image is from seven blot membranes.**

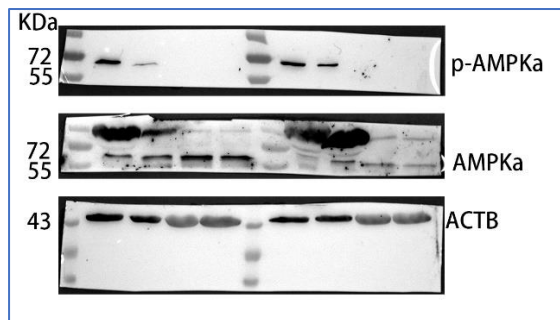

**Supplementary Figure 23. Western blots of Figure 4f. The blot image is from three blot membranes.**

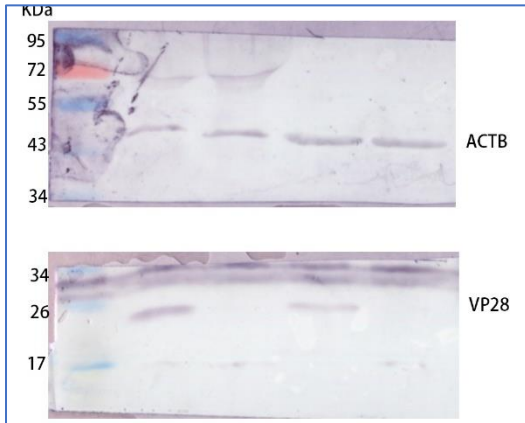

**Supplementary Figure 24. Western blots of Figure 4h. The blot image is from two blot membranes.**

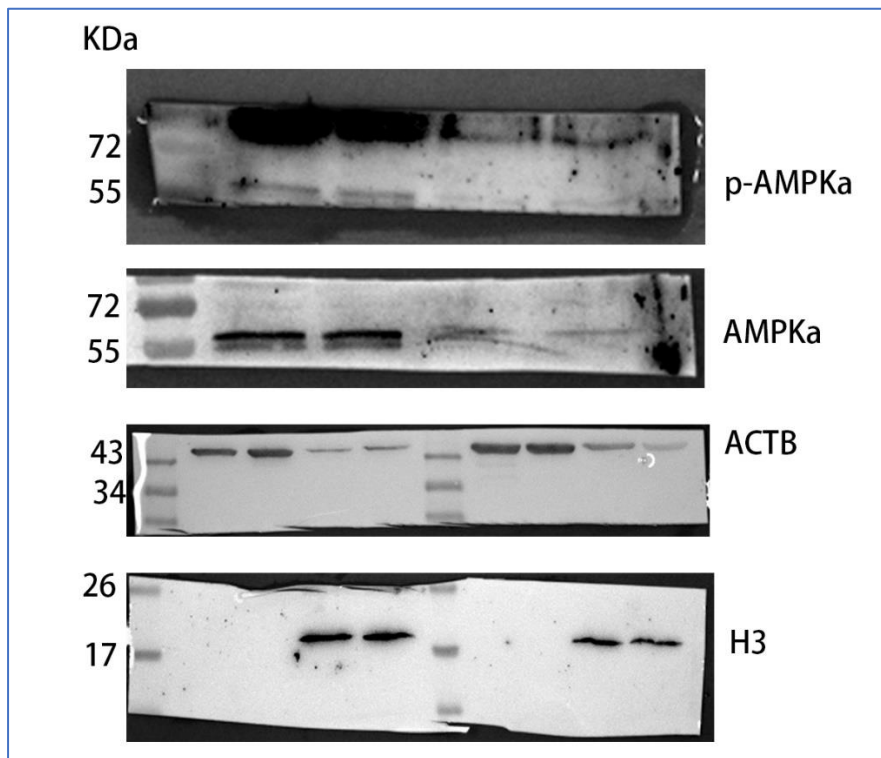

**Supplementary Figure 25. Western blots of Figure5b. The blot image is from four blot membranes.**

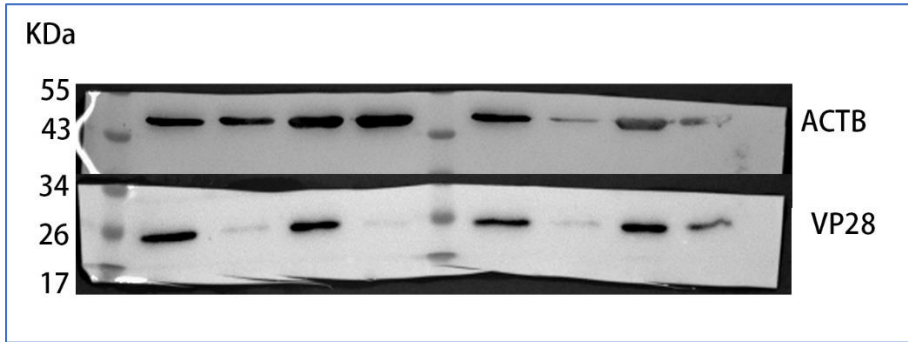

**Supplementary Figure 26. Western blots of Figure 6c. The blot image is from the same blot membrane.**

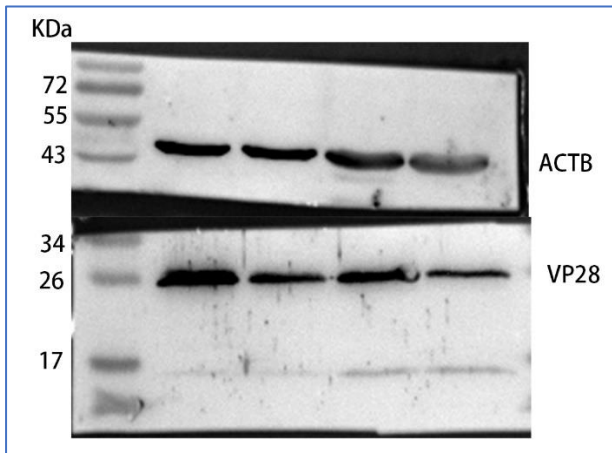

**Supplementary Figure 27. Western blots of Figure 6h. The blot image is from the same blot membrane.**

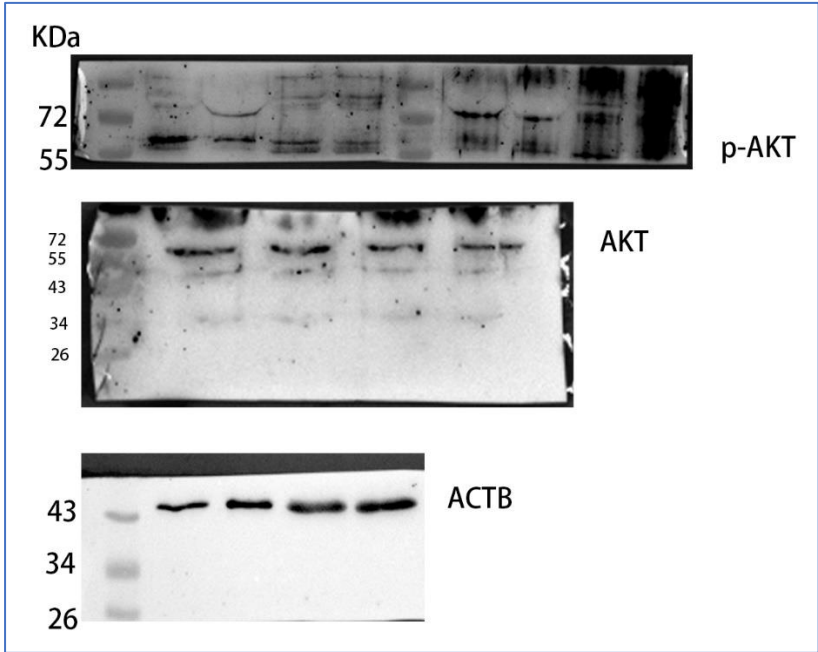

**Supplementary Figure 28. Western blots of Figure 7a. The blot image is from three blot membranes.**

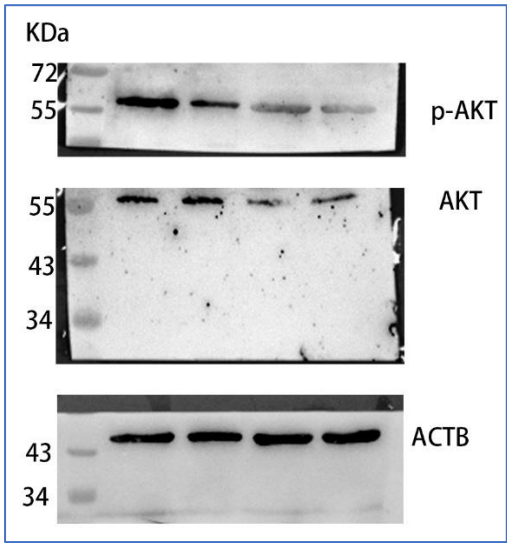

**Supplementary Figure 29. Western blots of Figure 7b. The blot image is from three blot membranes.**

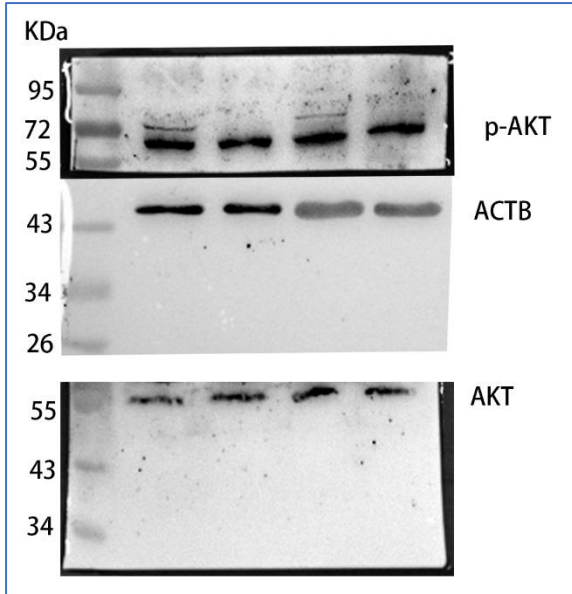

**Supplementary Figure 30. Western blots of Figure 7c. The blot image is from three blot membranes.**

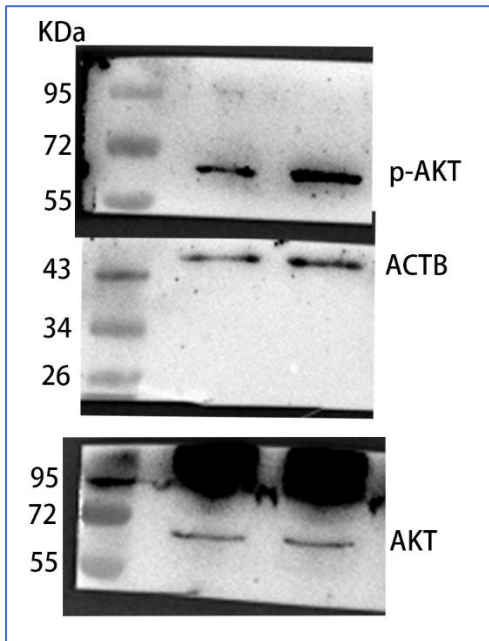

**Supplementary Figure 31. Western blots of Figure 7d. The blot image is from three blot membranes.**

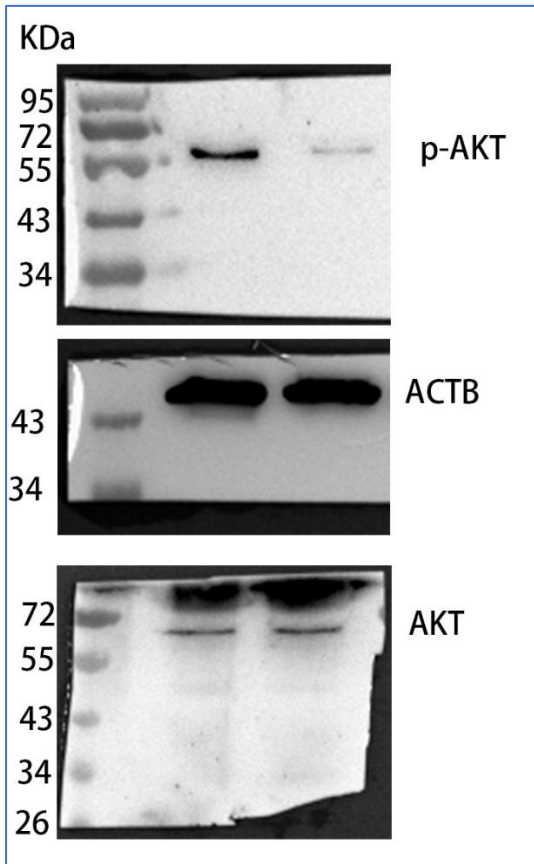

**Supplementary Figure 32. Western blots of Figure 7e. The blot image is from three blot membranes.**

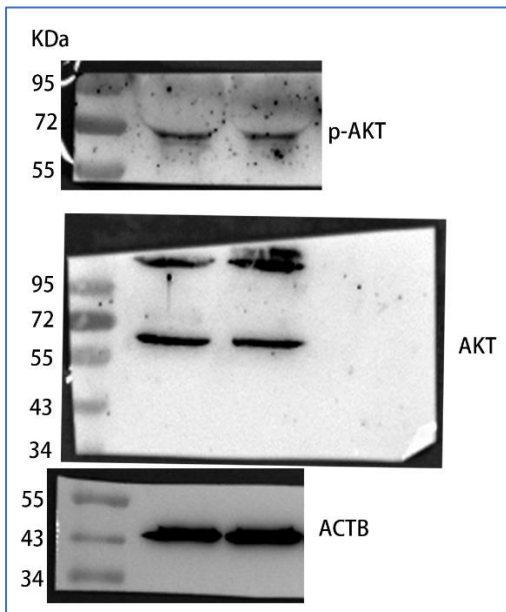

**Supplementary Figure 33. Western blots of Figure 7f. The blot image is from three blot membranes.**
