# Supplementary material for: WSSV exploits AMPK to activate mTORC2 signaling for proliferation by enhancing aerobic glycolysis
Source: PubMed Central journal article supplement (PMC10070494; doi:10.1038/s42003-023-04735-z), 2023-04-03
Supplement: 42003_2023_4735_MOESM2_ESM.pdf [file 42003_2023_4735_MOESM2_ESM.pdf]

## **Description of Additional Supplementary Files**

**File name:** Supplementary Data 1

**Description:** The numerical source data for graphs and charts in the paper.
